# Supplementary material for: Tunnel barrier to spin filter: Electronic-transport characteristics of transition metal atom encapsulated in a small Cadmium Telluride cage
Source: Royal Society of Chemistry journal article supplement (doi:10.1039/d2nr06134a), 2022-12-06
Supplement: d2nr06134a1.pdf [file d2nr06134a1.pdf]

## Supplementary Information

### Tunnel Barrier to Spin Filter: Electronic Transport Characteristics of Transition Metal Atom Encapsulated in Smallest Cadmium Telluride Cage

Kashinath T Chavan<sup>a,b</sup>, Sharat Chandra<sup>a,b</sup> and Anjali Kshirsagar<sup>c</sup>

<sup>a</sup>Materials Science Group, Indira Gandhi Centre for Atomic Research, Kalpakkam 603102,  
Tamil Nadu, India.

<sup>b</sup>Homi Bhabha National Institute, Training School Complex, Anushakti Nagar, Mumbai,  
400094, India

<sup>c</sup>Department of Physics, Savitribai Phule Pune University, Pune 411 007, India.

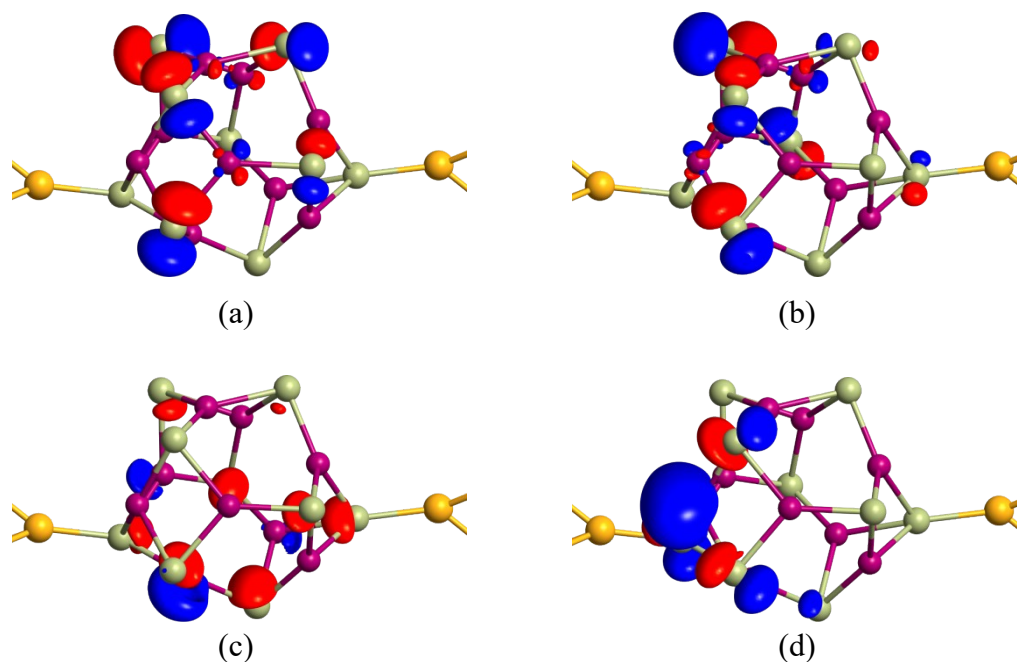

Figure S1. Eigenstates corresponding to (a) HOMO-1, (b) HOMO, (c) LUMO and (d) LUMO+1 energies of sandwiched Cd<sub>9</sub>Te<sub>9</sub> cluster [iso value: 0.1]. The results are identical for up and down spins, as expected. The Cd atoms are in magenta, Te in olive green and Au in yellow.

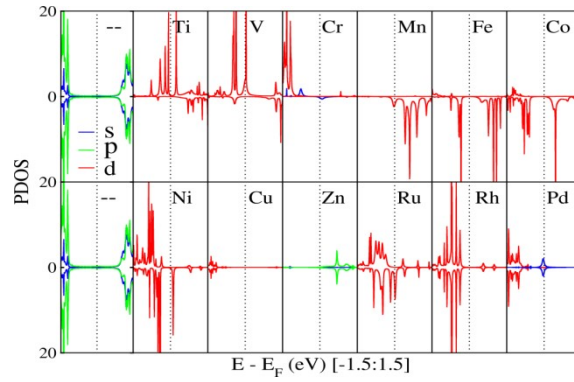

Figure S2. Spin resolved, orbital projected (TM  $s$ ,  $p$ ,  $d$ ) device density of states for TM atom(s) encapsulated in  $\text{Cd}_9\text{Te}_9$  cage sandwiched between Au (111) electrodes. Plots in the 1<sup>st</sup> column ( $\text{Cd } s$  and  $\text{Te } p$ ) correspond to a bare cage, a reference device. For each plot, energy ranges from -1.5 eV to 1.5 eV about the respective Fermi energy.

## Ti

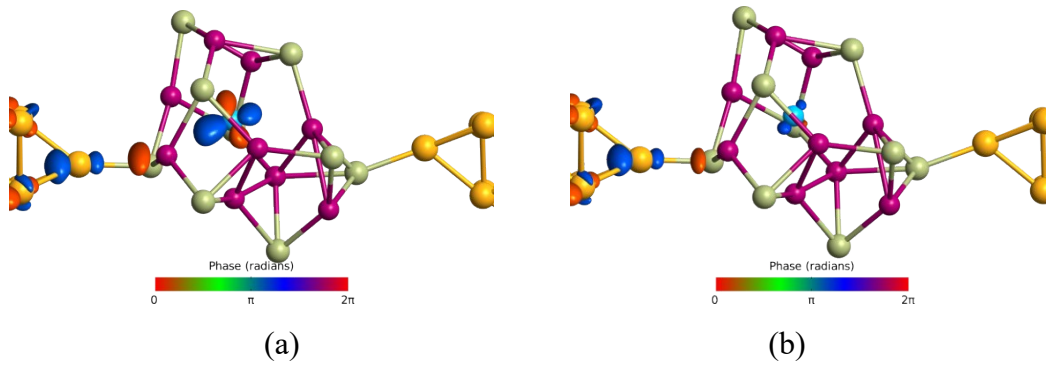

## Fe

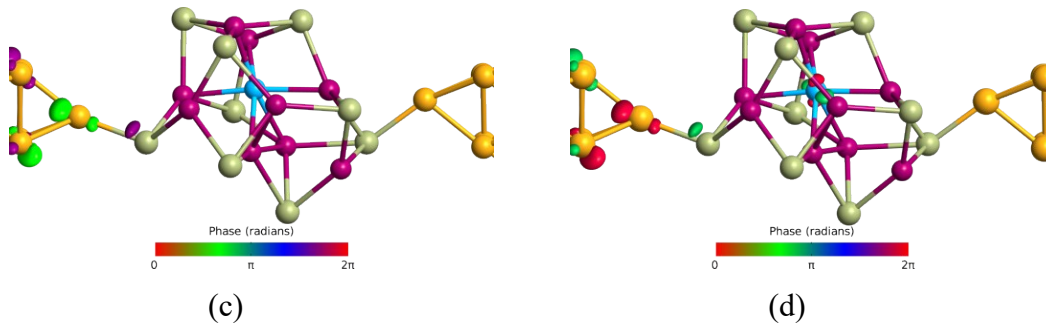

## Co

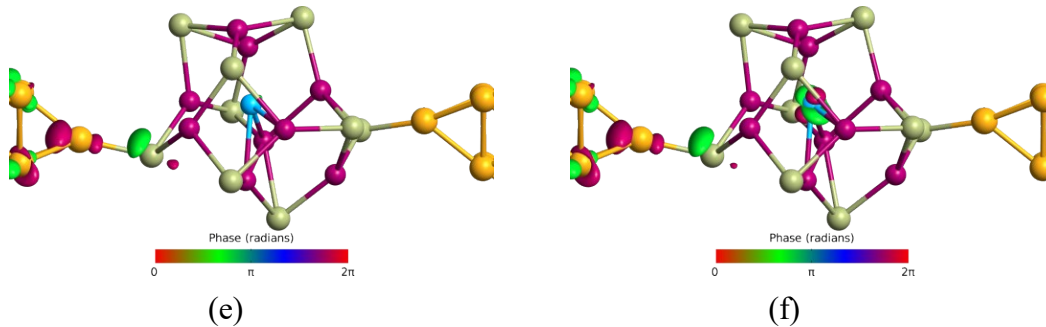

# Ni

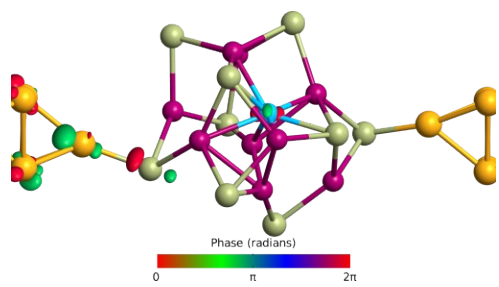

(g)

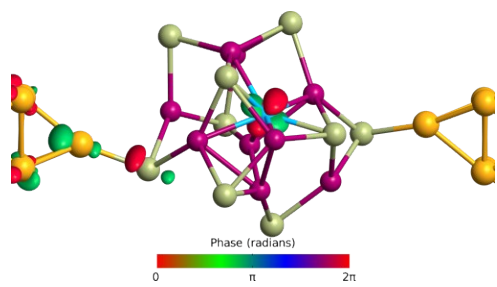

(h)

# Cu

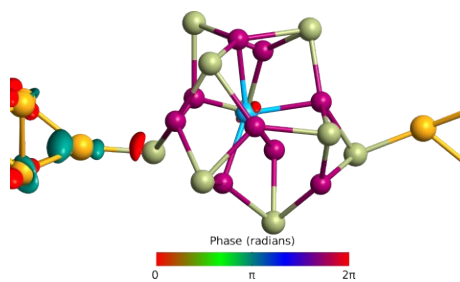

(i)

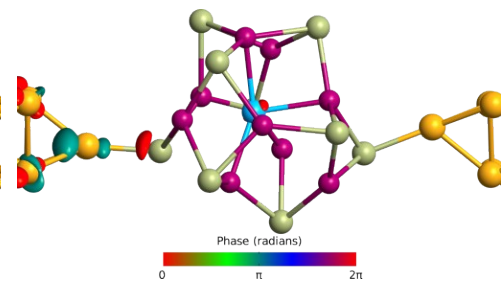

(j)

# Zn

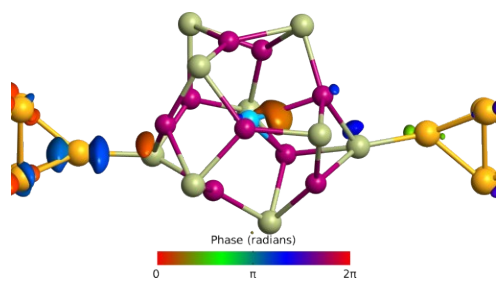

(k)

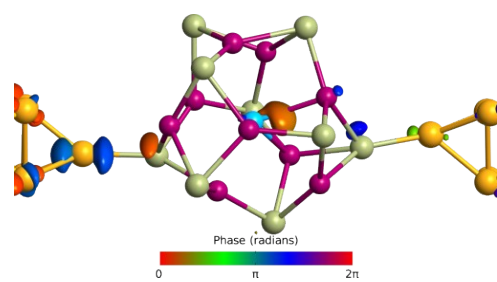

(l)

# Ru

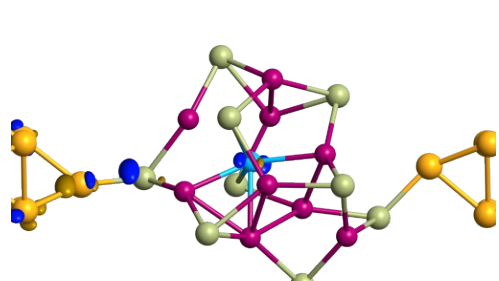

(m)

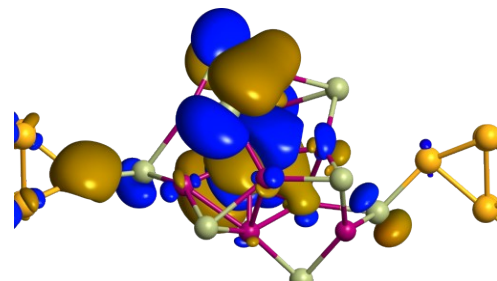

(n)

# Rh

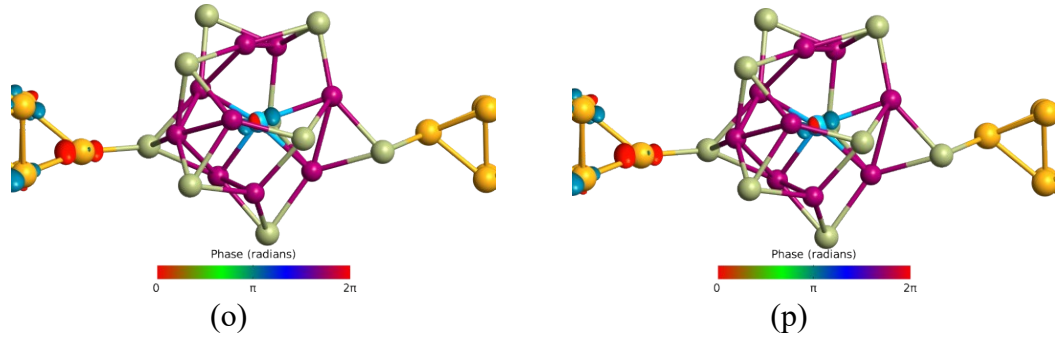

Figure S3: Transmission eigenstates for the device with respective TM atom encapsulated in Cd<sub>9</sub>Te<sub>9</sub> cage at Fermi level for (a) up and (b) down spins. (iso value: 0.4).

| TM | Transmission Eigenvalues (in eV) × 10 <sup>-2</sup> |           |
|----|-----------------------------------------------------|-----------|
|    | Up spin                                             | Down spin |
| Ti | 0.573                                               | 3.640     |
| V  | 1.728                                               | 2.340     |
| Cr | 6.335                                               | 29.57     |
| Mn | 3.819                                               | 18.66     |
| Fe | 0.634                                               | 1.090     |
| Co | 1.368                                               | 2.326     |
| Ni | 0.205                                               | 0.256     |
| Cu | 1.560                                               | 1.560     |
| Zn | 43.24                                               | 43.24     |
| Ru | 0.742                                               | 18.00     |
| Rh | 0.192                                               | 0.193     |
| Pd | 6.165                                               | 6.180     |

Table ST1: Transmission eigenvalues for device of TM atom(s) encapsulated in Cd<sub>9</sub>Te<sub>9</sub> cage at Fermi level for up and down spins.

| TM                | Isolated Cluster     |      |       |                    | In Device            |      |       |                    | Spin Polarization change (%)<br>from cluster to device<br>100(A - B)/B |
|-------------------|----------------------|------|-------|--------------------|----------------------|------|-------|--------------------|------------------------------------------------------------------------|
|                   | Total charge (↑ + ↓) |      |       | Difference (↑ - ↓) | Total charge (↑ + ↓) |      |       | Difference (↑ - ↓) |                                                                        |
|                   | Cd                   | Te   | TM    | TM (A)             | Cd                   | Te   | TM    | TM (B)             |                                                                        |
| <b>CdTe(12,6)</b> | 11.77                | 6.22 | -     | -                  | 11.78                | 6.17 | -     | -                  | --                                                                     |
| <b>Ti(4)</b>      | 11.79                | 6.20 | 4.06  | 1.90               | 11.79                | 6.16 | 4.07  | 2.20               | -15.8                                                                  |
| <b>V(5)</b>       | 11.81                | 6.21 | 4.83  | 3.73               | 11.81                | 6.17 | 4.89  | 3.44               | 8.0                                                                    |
| <b>Cr(6)</b>      | 11.84                | 6.20 | 5.64  | 5.17               | 11.85                | 6.15 | 5.64  | 5.02               | 2.9                                                                    |
| <b>Mn(7)</b>      | 11.82                | 6.20 | 6.86  | 4.89               | 11.83                | 6.15 | 6.85  | 4.65               | 4.8                                                                    |
| <b>Fe(8)</b>      | 11.80                | 6.20 | 7.93  | 3.63               | 11.81                | 6.16 | 7.88  | 3.28               | 9.8                                                                    |
| <b>Co(9)</b>      | 11.82                | 6.19 | 8.92  | 2.48               | 11.81                | 6.16 | 8.97  | 2.17               | 12.5                                                                   |
| <b>Ni(10)</b>     | 11.82                | 6.19 | 9.92  | 1.37               | 11.81                | 6.17 | 9.93  | 0.65               | 52.1                                                                   |
| <b>Cu(11)</b>     | 11.78                | 6.18 | 11.34 | 0.00               | 11.78                | 6.16 | 11.36 | 0.00               | 0.0                                                                    |
| <b>Zn(12)</b>     | 11.79                | 6.20 | 12.04 | 0.00               | 11.80                | 6.15 | 12.06 | 0.00               | 0.0                                                                    |
| <b>Ru(8)</b>      | 11.78                | 6.19 | 8.27  | 1.97               | 11.77                | 6.14 | 8.52  | 0.65               | 66.7                                                                   |
| <b>Rh(9)</b>      | 11.77                | 6.19 | 9.36  | 0.67               | 11.76                | 6.15 | 9.47  | 0.00               | 99.7                                                                   |
| <b>Pd(10)</b>     | 11.74                | 6.20 | 10.52 | 0.00               | 11.74                | 6.16 | 10.67 | 0.00               | 0.0                                                                    |

Table ST2: Total electronic population on each atom in TM encapsulated Cd<sub>9</sub>Te<sub>9</sub> cluster in isolated form and as a part of device. Total charge is addition of up and down spins, whereas the difference of the up and down spins shows the extent of spin polarization. The % change in spin polarization is the difference in the up and down spin populations of the TM atoms. The numbers are obtained from Mulliken analysis.
